# Supplementary material for: ViSTA: A Novel Network Improving Lung Adenocarcinoma Invasiveness Prediction from Follow-Up CT Series
Source: MDPI journal article supplement (doi:10.3390/cancers14153675), 2022-07-28
Supplement: s1 [file s1]

# ViSTA: A Novel Network Improving Lung Adenocarcinoma Invasiveness Prediction from Follow-Up CT Series

## Section S1: Supplementary Methods

### S1.1. Model Structure of ViSTA and SimTA

ViSTA consists of a CNN backbone (layers before the final fully-connected layer) and a SimTA module following the aforementioned CNN. The input of ViSTA is a series of 3D patches extracted from a sequence of follow-up visits targeted at the same nodule. These patches are first sent to the CNN backbone (ResNeXt [5] 3D in this research) to retrieve a time series of feature vectors. The feature sequence is then fed into the SimTA module [1], which captures global temporal relations using a simplified attention mechanism. A SimTA module can be made up of a single or a stack of several SimTA layers. **Supplementary Figure S1** provides an illustration of a single SimTA layer. Feature vectors from different timepoints first go through a shared linear layer and a non-linear activation. Next, an attention matrix is derived from intervals between each timepoint. The element on the  $i$ -th row and  $j$ -th column of matrix is calculated as follows:

$$A_{i,j} = \begin{cases} -\sigma(\lambda) \sum_{t=j}^i \tau_t + \beta, & i > j \\ 0, & i = j \\ -\infty, & i < j \end{cases}$$

Where  $\lambda$  and  $\beta$  are trainable scale and offset parameters, respectively.  $\tau \in \mathbb{R}^{T-1}$  is a vector representing time intervals between two adjacent timepoints.  $\sigma$  represents a non-linear activation function (ReLU [2] in this research) to ensure that  $-\sigma(\lambda) \leq 0$ . The  $i$ -th row of represents the influence each step has over the  $i$ -th timepoint. The intention is simple and intuitive: only previous timepoints should have impact on the current one, and the earlier the timepoint is, the less influence it has. Complete mathematical formulation of SimTA layer is as follows:

$$\text{SimTA}(x) = \text{LayerNorm}(x + \sigma(w^T x + b)) \otimes \text{softmax}(A)$$

where  $w$  and  $b$  are weights and biases of the linear layer, and  $\sigma$  is the non-linear activation function (ELU [3] is used in this research). The  $\otimes$  operator represents matrix multiplication. Here the softmax function is applied over the column axis as follows:

$$\text{softmax}(A_{i,j}) = \frac{e^{A_{i,j}}}{\sum_1^T e^{A_{i,t}}}$$

where  $e$  is the natural exponent. LayerNorm [4] normalizes features over the channel dimension. After the SimTA module, the feature vector of size  $T \times C$  is pooled to  $1 \times C$  by keeping only the last timepoint, then it is fed into a linear layer to perform classification.

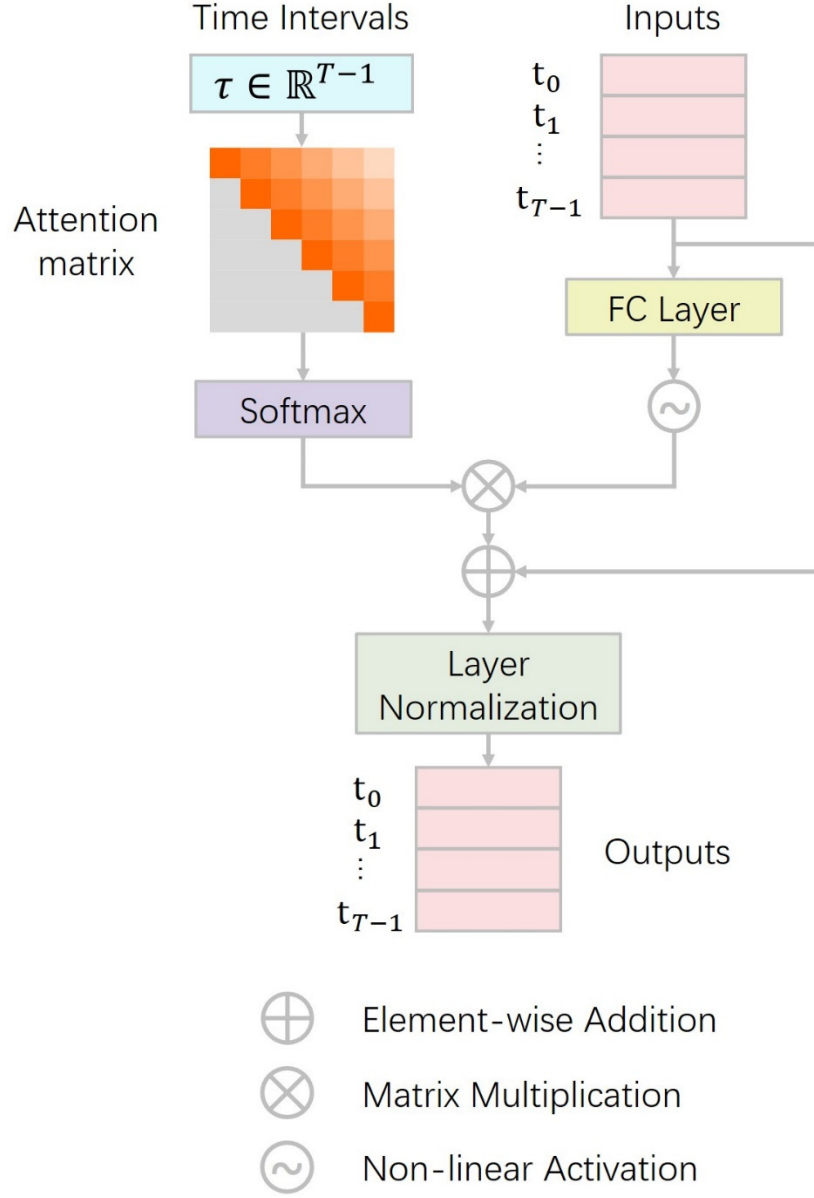

**Figure S1.** The illustration of a single SimTA layer. The colormap of the attention matrix indicates the magnitude of attention allocated in a particular timepoint. Gray represents zero attention. The darker the orange color is, the more attention the timepoint gets.

### S1.2. VDT (Volume Doubling Time)

VDT represents the time period it takes for a nodule to double its volume. It is calculated as follows:

$$VDT = \frac{t_1 - t_0}{\log_2(\frac{V_1}{V_0})}$$

where  $V_0$  and  $V_1$  represents the nodule volume at timepoint  $t_0$  and  $t_1$ , respectively. Since VDT does not increase monotonously with nodule's growth ( $VDT < 0$  if nodule shrinks), which is required for AUC calculation, we used  $1/VDT$  in our experiments to restore the monotony. The formula of Youden index is given in Section S1.3.

### S1.3 Formulas of Evaluation Metrics

To evaluate each method's performance, we used a variety of metrics including accuracy, precision, sensitivity, F1 score and AUC. Assume that  $TP_\eta$ ,  $TN_\eta$ ,  $FP_\eta$  and  $FN_\eta$  are true positives, true negatives, false positives and false negatives calculated at probability threshold  $\eta$ . The aforementioned metrics can be calculated as follows:

$$\text{accuracy}_\eta = \frac{TP_\eta + TN_\eta}{TP_\eta + TN_\eta + FP_\eta + FN_\eta}$$

$$\text{specificity}_\eta = \frac{TN_\eta}{TN_\eta + FP_\eta}$$

$$\text{sensitivity}_\eta = \frac{TP_\eta}{TP_\eta + FN_\eta}$$

$$\text{precision}_\eta = \frac{TP_\eta}{TP_\eta + FP_\eta}$$

$$F1_\eta = \frac{2 \times \text{precision}_\eta \times \text{sensitivity}_\eta}{\text{precision}_\eta + \text{sensitivity}_\eta}$$

$$\text{AUC} = \int_{\eta=0}^1 \text{sensitivity}_\eta d\eta$$

To calculate metrics that need a cutoff value (all metrics above except for AUC), we set the threshold between IA and non-IA at the value that gives the best Youden index on the validation dataset. The calculation of Youden index is defined as:

$$\text{Youden index}_\eta = \text{specificity}_\eta + \text{sensitivity}_\eta - 1$$

**Table S1.** Different models' performances in predicting invasiveness on the training dataset. The highest among all is highlighted in bold.

|                           | <b>AUC</b> | <b>Acc.</b> | <b>Prec.</b> | <b>Sens.</b> | <b>F1</b> |
|---------------------------|------------|-------------|--------------|--------------|-----------|
| 1/VDT (best Youden index) | 64.0%      | 62.0%       | 56.2%        | 73.9%        | 63.8%     |
| 1/VDT (400 days)          | 64.0%      | 58.8%       | 63.2%        | 21.6%        | 32.2%     |
| CNN last only             | 99.3%      | 95.9%       | 95.5%        | 95.5%        | 95.5%     |
| CNN first only            | 99.7%      | 96.7%       | 98.1%        | 94.6%        | 96.3%     |
| CNN all-first             | 100.0%     | 98.4%       | 96.5%        | 100.0%       | 98.2%     |
| CNN all-last              | 100.0%     | 100.0%      | 100.0%       | 100.0%       | 100.0%    |
| CNN+LSTM                  | 100.0%     | 99.6%       | 99.1%        | 100.0%       | 99.6%     |
| ViSTA                     | 92.9%      | 80.8%       | 74.2%        | 88.3%        | 80.7%     |

**Table S2.** Different models' performances in predicting invasiveness on the validation dataset. The highest among all is highlighted in bold.

| <b>Heading Title</b>      | <b>AUC</b> | <b>Acc.</b> | <b>Prec.</b> | <b>Sens.</b> | <b>F1</b> |
|---------------------------|------------|-------------|--------------|--------------|-----------|
| 1/VDT (best Youden index) | 62.4%      | 56.8%       | 51.9%        | 82.4%        | 63.6%     |
| 1/VDT (400 days)          | 62.4%      | 51.4%       | 42.9%        | 17.7%        | 25.0%     |
| CNN last only             | 74.4%      | 67.6%       | 64.7%        | 64.7%        | 64.7%     |
| CNN first only            | 67.4%      | 73.0%       | 81.8%        | 52.9%        | 64.3%     |
| CNN all-first             | 75.3%      | 73.0%       | 70.6%        | 70.6%        | 70.6%     |
| CNN all-last              | 76.8%      | 75.7%       | 78.6%        | 64.7%        | 71.0%     |
| CNN+LSTM                  | 79.1%      | 73.0%       | 66.7%        | 82.4%        | 73.7%     |
| ViSTA                     | 85.0%      | 78.4%       | 69.6%        | 94.1%        | 80.0%     |

## References

1. Yang, J.; Chen, J.; Kuang, K.; Lin, T.; He, J.; Ni, B. MIA-Prognosis: A Deep Learning Framework to Predict Therapy Response. In Proceedings of the International Conference on Medical Image Computing and Computer-Assisted Intervention, Lima, Peru, 4–8 October 2020.
2. Krizhevsky, A.; Sutskever, I.; Hinton, G. ImageNet Classification with Deep Convolutional Neural Networks. *Commun. ACM* **2017**, *60*, 84–90. <https://doi.org/10.1145/3065386>.
3. Clevert, D.-A.; Unterthiner, T.; Hochreiter, S. Fast and Accurate Deep Network Learning by Exponential Linear Units (ELUs). *arXiv* **2015**, arXiv:1511.07289. <https://doi.org/10.48550/arXiv.1511.07289>.
4. Ba, J.L.; Kiros, J.R.; Hinton, G.E. Layer Normalization. *arXiv* **2016**, arXiv:1607.06450.
5. Xie, S.; Girshick, R.; Dollár, P.; Tu, Z.; He, K. Aggregated Residual Transformations for Deep Neural Networks. In Proceedings of the IEEE Conference on Computer Vision and Pattern Recognition (CVPR), Honolulu, HI, USA, 21–26 July 2017.
